# Supplementary material
Source: publisher figshare collection journal article supplement (https://acs.figshare.com/ndownloader/files/4788172)
Supplement: Supplementary file 1 [file 4788172]

## SUPPORTING INFORMATION

Assessment of the halogen content of Brazilian inhalable particulate matter (PM<sub>10</sub>)  
using high resolution molecular absorption spectrometry and electrothermal  
vaporization inductively coupled plasma mass spectrometry, with direct solid sample  
analysis

Jefferson S. de Gois<sup>a,1</sup>, Tarcisio S. Almeida<sup>a</sup>, Jeferson C. Alves<sup>b,c</sup>, Rennan G. O.

Araujo<sup>b,c</sup> and Daniel L. G. Borges<sup>a,#,\*</sup>

<sup>a</sup> Department of Chemistry, Federal University of Santa Catarina, 88040-900,  
Florianópolis, SC, Brazil.

<sup>b</sup> Department of Analytical Chemistry, Institute of Chemistry, Federal University of  
Bahia, 40170-115, Salvador, BA, Brazil

<sup>c</sup> Environmental Analytical Chemistry Laboratory, Department of Chemistry, Federal  
University of Sergipe, 49100-000, São Cristovão, SE, Brazil

<sup>#</sup> INCT de Energia e Ambiente do CNPq, [www.inct.cienam.ufba.br](http://www.inct.cienam.ufba.br), Florianópolis, SC,  
Brazil

<sup>1</sup>This study is part of Jefferson S. de Gois' PhD thesis.

\* Corresponding author (D.L.G.B.)

E-mail: [daniel.borges@ufsc.br](mailto:daniel.borges@ufsc.br)

Phone number: (+55 48) 3721-3611

This supporting information file contains four pages and three figures, numbered from  
S1 to S3.

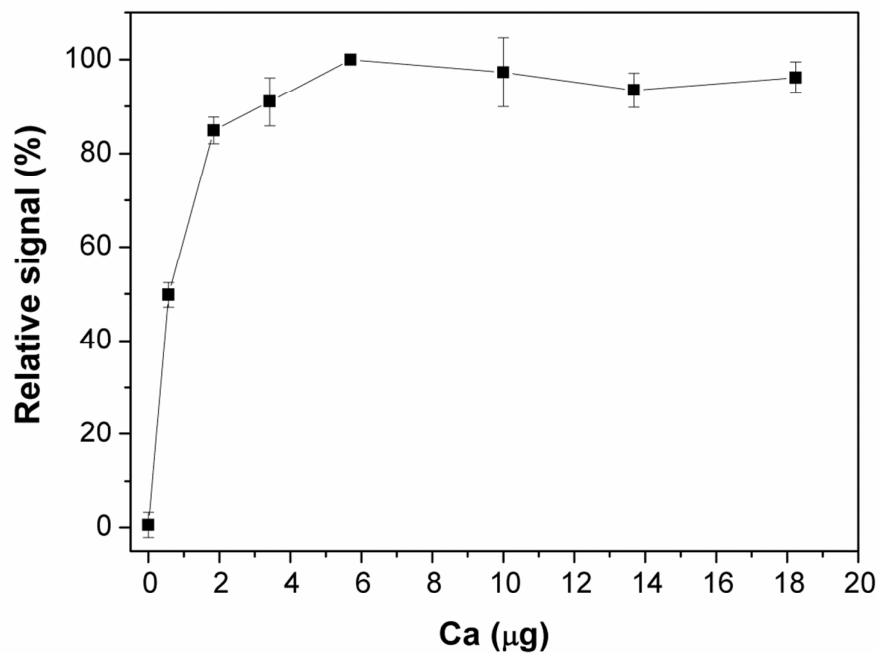

**Figure S1.** Effect of Ca mass on the signal obtained for the CaF molecule by SS-HR-CS GF MAS at 606.4322 nm using 100 ng F as an aqueous solution. Pyrolysis and vaporization temperatures were set at 1100 °C and 2200 °C, respectively. Relative signal refers to the percent ratio between individual values and the maximum value in the series.

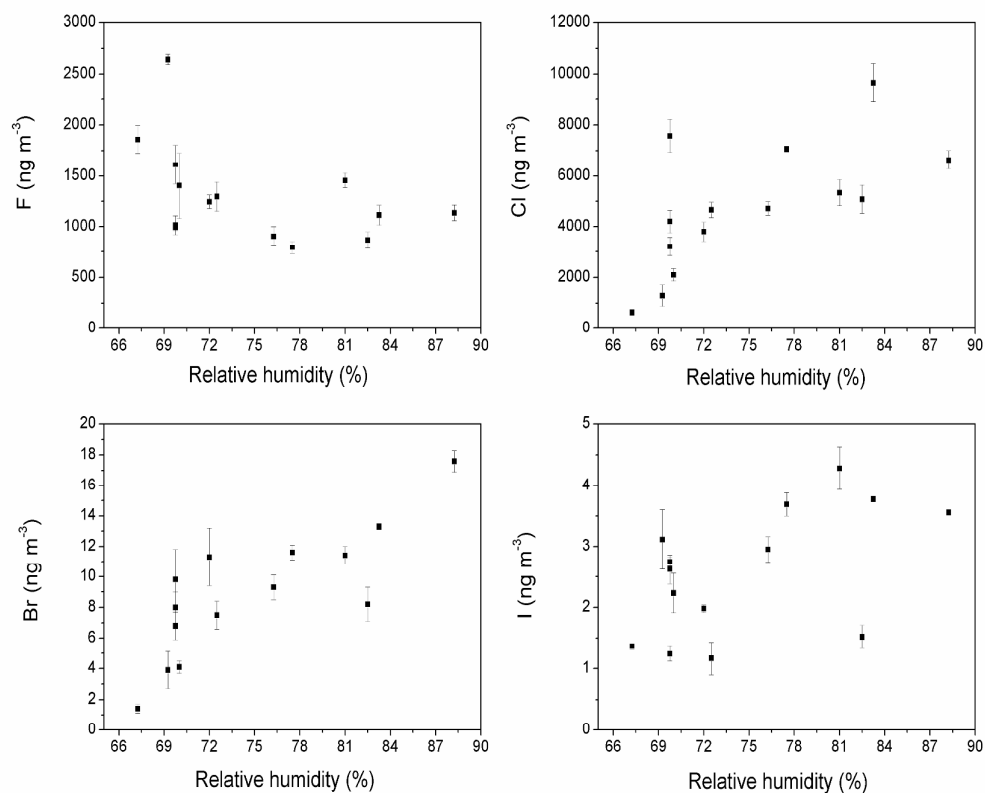

**Figure S2.** Effect of relative air humidity on the determined concentrations of F (obtained by SS-HR-CS GF MAS), Br, Cl and I (obtained by SS-ETV-ICP-MS) in airborne inhalable particulate matter (PM<sub>10</sub>) samples. The PM<sub>10</sub> samples were collected in the coastal city of Aracaju, Sergipe, Brazil, between February and June, 2013.

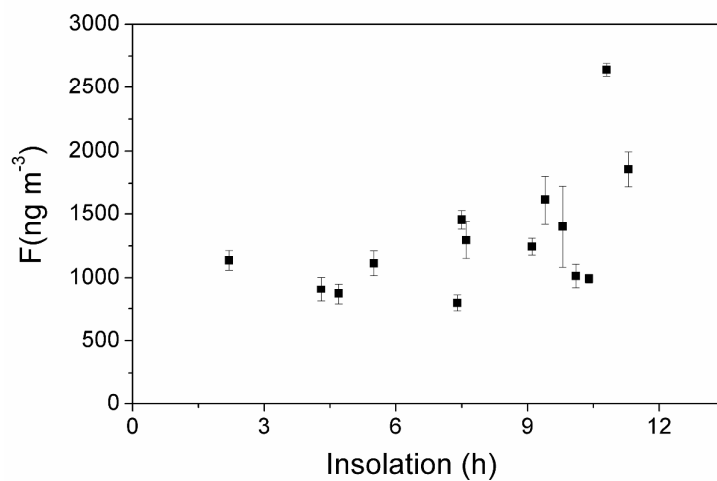

**Figure S3.** Effect of sunlight irradiation (insolation) on the determined concentration of F obtained by SS-HR-CS GF MAS in airborne inhalable particulate matter (PM<sub>10</sub>) samples collected in the coastal city of Aracaju, Sergipe, Brazil.
